# Supplementary material
Source: PubMed Central journal article supplement (PMC8647810)
Supplement: NIHMS1749067-supplement-1.pdf [file NIHMS1749067-supplement-1.pdf]

---

**Evaluating Medical Therapy for Calcific Aortic Stenosis:**

**JACC State-of-the-Art Review**

*Brief title: Evaluating Medical Therapy for Calcific AS*

**Data Supplement**

Journal Pre-proof

**Supplementary Table 1. Retrospective Studies Evaluating Progression of Aortic Stenosis Severity over Time**

| First Author                | Year | N    | Mean follow-up when available (years)                    | Baseline population entry criteria and study design                                                                                                                                        | Modality to assess progression | Baseline aortic valve measurements (and % with mild, moderate, and severe when available)                                                                                                                                                                                   | Annualized progression rate of AS severity (AVA, V <sub>peak</sub> , ΔP, AVC score)                                                                                                                                                                    |
|-----------------------------|------|------|----------------------------------------------------------|--------------------------------------------------------------------------------------------------------------------------------------------------------------------------------------------|--------------------------------|-----------------------------------------------------------------------------------------------------------------------------------------------------------------------------------------------------------------------------------------------------------------------------|--------------------------------------------------------------------------------------------------------------------------------------------------------------------------------------------------------------------------------------------------------|
| <b>Roger et al. (1)</b>     | 1990 | 112  | 2.1                                                      | Echocardiographic evidence of AS. V <sub>peak</sub> ≥2m/s. At least three Doppler examinations during study period<br><br>Retrospective                                                    | Echocardiography               | V <sub>peak</sub> : 2.9 ± 0.7 m/s<br>ΔP <sub>max</sub> : 35 ± 18 mmHg<br><br>Mild (V <sub>peak</sub> ):<br>2.0 to 2.4 m/s: 33%<br>2.5 to 2.9 m/s: 21%<br>Moderate (V <sub>peak</sub> ):<br>3.0 to 3.4 m/s: 21%<br>Moderate to severe (V <sub>peak</sub> ):<br>≥3.5 m/s: 24% | Mild (V <sub>peak</sub> ):<br>2.0 to 2.4 m/s: 0.18 ± 0.22 m/s/y<br>2.5 to 2.9 m/s: 0.32 ± 0.38 m/s/y<br>Moderate (V <sub>peak</sub> ):<br>3.0 to 3.4 m/s: 0.21 ± 0.33 m/s/y<br>Moderate to severe (V <sub>peak</sub> ):<br>≥3.5 m/s: 0.24 ± 0.52 m/s/y |
| <b>Brener et al. (2)</b>    | 1995 | 394  | 2.8                                                      | Echocardiographic evidence of AS and at least two studies ≥1 year apart<br><br>Retrospective                                                                                               | Echocardiography               | N/A                                                                                                                                                                                                                                                                         | AVA: -0.4 cm <sup>2</sup> /y<br>ΔP <sub>mean</sub> : 6.3 mmHg/y                                                                                                                                                                                        |
| <b>Bahler et al. (3)</b>    | 1999 | 91   | 1.8                                                      | Echocardiographic evidence of AS (initial AVA ≤2.0cm <sup>2</sup> ) and ≥2 studies separated by ≥6 months<br><br>Retrospective                                                             | Echocardiography               | AVA: 1.24 ± 0.34 cm <sup>2</sup><br>V <sub>peak</sub> : 2.64 ± 0.62 m/s<br>ΔP <sub>mean</sub> : 15.8 ± 9.27 mmHg                                                                                                                                                            | AVA: -0.04 cm <sup>2</sup> /y<br>V <sub>peak</sub> : 0.19 ± 0.06 m/s/y<br>P <sub>mean</sub> : 2.8 ± 1.36 mmHg/y                                                                                                                                        |
| <b>Palta et al. (4)</b>     | 2000 | 170  | 1.9                                                      | Echocardiographic evidence of AS with paired echocardiograms ≥3 months apart<br><br>Retrospective                                                                                          | Echocardiography               | AVA: 1.17 ± 0.38 cm <sup>2</sup><br>V <sub>peak</sub> : 2.7 ± 0.07 m/s<br>ΔP <sub>mean</sub> : 20 ± 10 mmHg                                                                                                                                                                 | AVA: -0.10 ± 0.27 cm <sup>2</sup> /y<br>ΔP <sub>mean</sub> : 3.7 mmHg/y                                                                                                                                                                                |
| <b>Rosenhek et al. (5)</b>  | 2004 | 176  | 4                                                        | Echocardiographic evidence of mild to moderate AS with peak velocity of 2.5-3.9 m/s and without symptoms<br><br>Retrospective                                                              | Echocardiography               | N/A                                                                                                                                                                                                                                                                         | V <sub>peak</sub> : 0.24 ± 0.30 m/s/y<br><br>None/mild calcification:<br>V <sub>peak</sub> : 0.16 ± 0.19 m/s/y<br><br>Moderate/severe calcification:<br>V <sub>peak</sub> : 0.35 ± 0.31 m/s/y                                                          |
| <b>Ersboll et al. (6)</b>   | 2015 | 1558 | 1.9 in moderate AS patients and 3.4 in mild AS patients* | Contemporary, unselected cohort of patients with AS with information available in clinical database and at least 1 follow-up echocardiogram ≥90 days from index study<br><br>Retrospective | Echocardiography               | ΔP <sub>mean</sub> : 19 (13-31)<br><br>Mild (ΔP <sub>mean</sub> ): 63%<br>Moderate (ΔP <sub>mean</sub> ): 23%<br>Severe (ΔP <sub>mean</sub> ): 14%                                                                                                                          | Mild:<br>ΔP <sub>mean</sub> :<br>6.8% (95% CI 6.0-7.6)<br><br>Moderate:<br>ΔP <sub>mean</sub> :<br>7.1% (95% CI 4.8-9.3)                                                                                                                               |
| <b>Capoulade et al. (7)</b> | 2015 | 220  | 3.5                                                      | Echocardiographic evidence of mild-to-moderate AS (V <sub>peak</sub> 2.5-4.0 m/s) without symptoms<br><br>Retrospective analysis of prospective study                                      | Echocardiography               | AVA: 1.34 ± 0.42 cm <sup>2</sup><br>V <sub>peak</sub> : 3.2 ± 0.4 m/s<br>ΔP <sub>mean</sub> : 22 ± 7 mmHg                                                                                                                                                                   | Lp(a) Tertiles 1 and 2 (≤58.5 mg/dL):<br>V <sub>peak</sub> : 0.17 ± 0.02 m/s/y<br><br>Lp(a) Tertile 3 (>58.5 mg/dL):                                                                                                                                   |

|                             |      |                |                                     |                                                                                                                                                                                                                                                 |                         |                                                                                                                                                                                                                                                        |                                                                                                                                                                                                                                                                               |
|-----------------------------|------|----------------|-------------------------------------|-------------------------------------------------------------------------------------------------------------------------------------------------------------------------------------------------------------------------------------------------|-------------------------|--------------------------------------------------------------------------------------------------------------------------------------------------------------------------------------------------------------------------------------------------------|-------------------------------------------------------------------------------------------------------------------------------------------------------------------------------------------------------------------------------------------------------------------------------|
|                             |      |                |                                     |                                                                                                                                                                                                                                                 |                         |                                                                                                                                                                                                                                                        | $V_{\text{peak}}$ : $0.26 \pm 0.03$ m/s/y<br>OxPL-apoB Tertiles 1 and 2:<br>( $\leq 5.5$ nM):<br>$V_{\text{peak}}$ : $0.17 \pm 0.02$ m/s/y<br>OxPL-apoB Tertile 3:<br>( $> 5.5$ mg/dL):<br>$V_{\text{peak}}$ : $0.26 \pm 0.03$ m/s/y                                          |
| <b>Nishimura et al. (8)</b> | 2016 | 140            | 3.9                                 | Echocardiographic evidence of severe AS (AVA: 0.75-1.0 cm <sup>2</sup> ) and without symptoms<br><br>Retrospective                                                                                                                              | Echocardiography        | AVA: $0.90 \pm 0.08$ cm <sup>2</sup><br>$V_{\text{peak}}$ : $3.68 \pm 0.56$ m/s<br>$\Delta P_{\text{mean}}$ : $33.1 \pm 11.3$ mmHg                                                                                                                     | AVA: $-0.07 \pm 0.10$ cm <sup>2</sup> /y<br>$V_{\text{peak}}$ : $0.27 \pm 0.35$ m/s/y                                                                                                                                                                                         |
| <b>Tastet et al. (9)</b>    | 2019 | 303 (CT N=220) | 2.6* (echocardiography) and 2* (CT) | Echocardiographic evidence of at least mild AS ( $V_{\text{peak}} \geq 2.0$ m/s and/or AVA $< 2.0$ cm <sup>2</sup> ) and with available repeat echocardiography or CT within $> 6$ months.<br><br>Prospective and retrospective data collection | Echocardiography and CT | Warfarin:<br>$V_{\text{peak}}$ : $2.5 \pm 0.5$ m/s<br>AVC: 395 (63-991) AU<br><br>DOAC:<br>$V_{\text{peak}}$ : $2.3 \pm 0.5$ m/s<br>AVC: 322 (64-820) AU<br><br>No Anticoagulation:<br>$V_{\text{peak}}$ : $2.7 \pm 0.4$ m/s<br>AVC: 511 (254-1015) AU | Warfarin:<br>$V_{\text{peak}}$ : $0.14$ (0.06-0.32) m/s/y<br>AVC: 204 (48-317) AU/y<br><br>DOAC:<br>$V_{\text{peak}}$ : $0.10$ (-0.01-0.20) m/s/y<br>AVC: 66 (11-86) AU/y<br><br>No Anticoagulation:<br>$V_{\text{peak}}$ : $0.09$ (0.04-0.19) m/s/y<br>AVC: 94 (31-203) AU/y |
| <b>Kebed et al. (10)</b>    | 2020 | 916            | 1.4                                 | Echocardiographic evidence of mild to severe AS with multiple TTEs during study period.<br><br>Retrospective                                                                                                                                    | Echocardiography        | Mild (AVA): 32%<br>Moderate (AVA): 51%<br>Severe (AVA): 17%                                                                                                                                                                                            | Mild:<br>AVA: $-0.106 \pm 0.005$ cm <sup>2</sup> /y<br><br>Moderate:<br>AVA: $-0.068 \pm 0.004$ cm <sup>2</sup> /y<br><br>Severe:<br>AVA: $-0.032 \pm 0.009$ cm <sup>2</sup> /y                                                                                               |
| <b>Nayeri et al. (11)</b>   | 2020 | 364            | 1.3*                                | Evidence of mild or moderate AS on echocardiography and $\geq 2$ surveillance echocardiograms $\geq 6$ months apart (without progression to severe by time of first repeat study)<br><br>Retrospective                                          | Echocardiography        | $V_{\text{peak}}$ : $2.7$ (2.3-3.2) m/s<br>$\Delta P_{\text{mean}}$ : $15$ (11-21) mmHg                                                                                                                                                                | $V_{\text{peak}}$ : $0.11$ (-0.09-0.32) m/s/y<br>$\Delta P_{\text{mean}}$ : $1.44$ (-0.34-4.00) mmHg/y                                                                                                                                                                        |

Modified from 2021 ACC/AHA Guideline for Management of Valvular Heart Disease by Otto et al. \*Median follow-up. Data are mean  $\pm$  SD, median (IQR), or % (95% CI) as available. AS = aortic stenosis; AVA = aortic valve area; CT = computed tomography;  $\Delta P$  = transaortic pressure gradient; IQR = interquartile range; RCT = randomized clinical trial; SD = standard deviation;  $V_{\text{peak}}$  = peak aortic valve velocity

## References

1. Roger VL, Tajik AJ, Bailey KR, Oh JK, Taylor CL, Seward JB. Progression of Aortic-Stenosis in Adults - New Appraisal Using Doppler Echocardiography. *Am Heart J* 1990;119:331-338.
2. Brener SJ, Duffy CI, Thomas JD, Stewart WJ. Progression of aortic stenosis in 394 patients: relation to changes in myocardial and mitral valve dysfunction. *J Am Coll Cardiol* 1995;25:305-10.
3. Bahler RC, Desser DR, Finkelhor RS, Brener SJ, Youssefi M. Factors leading to progression of valvular aortic stenosis. *Am J Cardiol* 1999;84:1044-8.
4. Palta S, Pai AM, Gill KS, Pai RG. New insights into the progression of aortic stenosis: implications for secondary prevention. *Circulation* 2000;101:2497-502.
5. Rosenhek R, Klaar U, Schemper M et al. Mild and moderate aortic stenosis. Natural history and risk stratification by echocardiography. *Eur Heart J* 2004;25:199-205.
6. Ersboll M, Schulte PJ, Al Enezi F et al. Predictors and progression of aortic stenosis in patients with preserved left ventricular ejection fraction. *Am J Cardiol* 2015;115:86-92.
7. Capoulade R, Mahmut A, Tastet L et al. Impact of plasma Lp-PLA2 activity on the progression of aortic stenosis: the PROGRESSA study. *JACC Cardiovasc Imaging* 2015;8:26-33.
8. Nishimura S, Izumi C, Nishiga M et al. Predictors of Rapid Progression and Clinical Outcome of Asymptomatic Severe Aortic Stenosis. *Circ J* 2016;80:1863-9.
9. Tastet L, Pibarot P, Shen M et al. Oral Anticoagulation Therapy and Progression of Calcific Aortic Valve Stenosis. *J Am Coll Cardiol* 2019;73:1869-1871.
10. Kebed K, Sun D, Addetia K, Mor-Avi V, Markuzon N, Lang RM. Progression of aortic stenosis and echocardiographic criteria for its severity. *European heart journal cardiovascular Imaging* 2020;21:737-743.
11. Nayeri A, Xu M, Farber-Eger E et al. Initial changes in peak aortic jet velocity and mean gradient predict progression to severe aortic stenosis. *Int J Cardiol Heart Vasc* 2020;30:100592.
